# Supplementary material
Source: PubMed Central journal article supplement (PMC4313220)
Supplement: JCM.01609-14_zjm999093794so1.pdf [file JCM.01609-14_zjm999093794so1.pdf]

**Supplemental Table 1. Characteristics of the 324 *Kingella kingae* isolates used in this study.** Previously published strains (n=134) are in normal font, while newly genotyped strains (n=190) are in bold font.

| Strain            | Sequence type | Year | Country | City - Region | Disease                  |
|-------------------|---------------|------|---------|---------------|--------------------------|
| ATCC 23330        | 1             | 1966 | Norway  | Oslo          | Carriage                 |
| BB060             | 2             | 2006 | Israel  | South         | Carriage                 |
| KK60              | 2             | 1994 | Israel  | South         | Endocarditis             |
| KK88              | 2             | 1996 | Israel  | North         | Osteoarticular infection |
| <b>Sch545</b>     | <b>2</b>      | 2011 | Israel  | South         | Carriage                 |
| <b>KK112</b>      | <b>2</b>      | 1996 | Israel  | South         | Carriage                 |
| <b>0309+30201</b> | <b>2</b>      | 2003 | Iceland | Reykjavik     | Osteoarticular infection |
| <b>CA55</b>       | <b>2</b>      | 2001 | Spain   | Barcelona     | Osteoarticular infection |
| <b>CA131</b>      | <b>2</b>      | 2011 | Spain   | Barcelona     | Osteoarticular infection |
| AA046             | 3             | 2006 | Israel  | South         | Carriage                 |
| Sch187            | 3             | 2010 | Israel  | South         | Carriage                 |
| CC388c            | 3             | 2006 | Israel  | South         | Carriage                 |
| PER486            | 3             | 2010 | Israel  | South         | Carriage                 |
| BB429             | 3             | 2007 | Israel  | South         | Carriage                 |
| CC397             | 3             | 2007 | Israel  | South         | Carriage                 |
| PER1588           | 3             | 2010 | Israel  | South         | Carriage                 |
| PER1827           | 3             | 2010 | Israel  | South         | Carriage                 |
| AA528             | 3             | 2007 | Israel  | South         | Carriage                 |
| BB033             | 3             | 2006 | Israel  | South         | Carriage                 |
| PVC3339           | 3             | 2007 | Israel  | South         | Carriage                 |
| KK70              | 4             | 1993 | Israel  | South         | Osteoarticular infection |
| BB631             | 5             | 2006 | Israel  | South         | Carriage                 |
| KK3               | 5             | 1994 | Israel  | South         | Carriage                 |
| KK171             | 5             | 2001 | Israel  | North         | Osteoarticular infection |
| VIR5453           | 5             | 2006 | Israel  | North         | Carriage                 |
| <b>Sch525</b>     | <b>5</b>      | 2011 | Israel  | South         | Carriage                 |
| <b>Sch1561</b>    | <b>5</b>      | 2012 | Israel  | South         | Carriage                 |
| <b>KK116</b>      | <b>5</b>      | 1996 | Israel  | South         | Carriage                 |
| <b>KK117</b>      | <b>5</b>      | 1996 | Israel  | South         | Carriage                 |
| HAN 26314         | 6             | 2007 | France  | Paris         | Osteoarticular infection |
| N10-9223          | 6             | 2010 | France  | Nantes        | Osteoarticular infection |
| N10-10419         | 6             | 2010 | France  | Nantes        | Endocarditis             |
| HAM 137138        | 6             | 2011 | France  | Paris         | Osteoarticular infection |
| SIL 32489         | 6             | 2011 | France  | Paris         | Osteoarticular infection |
| AA417             | 6             | 2006 | Israel  | South         | Carriage                 |
| CC013             | 6             | 2006 | Israel  | South         | Carriage                 |
| CC388             | 6             | 2006 | Israel  | North         | Carriage                 |
| KK6               | 6             | 1994 | Israel  | South         | Carriage                 |
| KK71              | 6             | 1994 | Israel  | South         | Occult Bacteremia        |
| KK86              | 6             | 1994 | Israel  | South         | Carriage                 |
| KK101             | 6             | 1992 | Israel  | South         | Osteoarticular infection |
| KK107             | 6             | 1996 | Israel  | South         | Carriage                 |
| KK131             | 6             | 1997 | Israel  | South         | Occult Bacteremia        |
| KK145             | 6             | 1998 | Israel  | East          | Osteoarticular infection |
| KK156             | 6             | 2002 | Israel  | South         | Osteoarticular infection |
| KK199             | 6             | 2004 | Israel  | North         | Endocarditis             |
| KK203             | 6             | 2004 | Israel  | South         | Carriage                 |
| KK223             | 6             | 2005 | Israel  | Center        | Osteoarticular infection |

|                       |          |        |          |               |                          |
|-----------------------|----------|--------|----------|---------------|--------------------------|
| KK260                 | 6        | 2007   | Israel   | South         | Occult Bacteremia        |
| KK274                 | 6        | 2009   | Israel   | South         | Osteoarticular infection |
| KK411                 | 6        | 2008   | Israel   | East          | Endocarditis             |
| M2004000037           | 6        | 2004   | USA      | Minnesota     | Carriage                 |
| C2005004457           | 6        | 2005   | USA      | Minnesota     | Osteoarticular infection |
| C2005004524           | 6        | 2005   | USA      | Minnesota     | Osteoarticular infection |
| C2007000490           | 6        | 2007   | USA      | Minnesota     | Osteoarticular infection |
| 0211+12480            | 6        | 2002   | Iceland  | Reykjavik     | Osteoarticular infection |
| 0303+28260            | 6        | 2003   | Iceland  | Reykjavik     | Osteoarticular infection |
| 0405+30002            | 6        | 2004   | Iceland  | Reykjavik     | Osteoarticular infection |
| 9508+31135            | 6        | 1995   | Iceland  | Reykjavik     | Osteoarticular infection |
| <b>AA242</b>          | <b>6</b> | 2006   | Israel   | South         | Carriage                 |
| <b>BB290</b>          | <b>6</b> | 2006   | Israel   | South         | Carriage                 |
| <b>KK252</b>          | <b>6</b> | 2007   | Israel   | South         | Occult Bacteremia        |
| <b>KK403</b>          | <b>6</b> | 2008   | Israel   | South         | Occult Bacteremia        |
| <b>KK92</b>           | <b>6</b> | 1996   | Israel   | North         | Occult Bacteremia        |
| <b>Namer 29.9</b>     | <b>6</b> | 2012   | Israel   | South         | Carriage                 |
| <b>KK431</b>          | <b>6</b> | 2012   | Israel   | South         | Occult Bacteremia        |
| <b>KK218</b>          | <b>6</b> | 2004   | Israel   | South         | Carriage                 |
| <b>PER2265</b>        | <b>6</b> | 2011   | Israel   | South         | Carriage                 |
|                       |          | Unknow |          |               |                          |
| <b>PP1</b>            | <b>6</b> | n      | USA      | New York      | Osteoarticular infection |
| <b>0604+15110</b>     | <b>6</b> | 2006   | Iceland  | Reykjavik     | Osteoarticular infection |
| <b>AMO 34676</b>      | <b>6</b> | 2012   | France   | Paris         | Osteoarticular infection |
| <b>NICE 476</b>       | <b>6</b> | 2012   | France   | Nice          | Osteoarticular infection |
| <b>QAS 30270110-S</b> | <b>6</b> | 2013   | France   | Paris         | Osteoarticular infection |
| <b>LEP 6724</b>       | <b>6</b> | 2009   | France   | Bordeaux      | Unknown                  |
|                       |          |        | Australi |               |                          |
| <b>AUS 01</b>         | <b>6</b> | 2013   | a        | Geelong       | Endocarditis             |
| <b>MAS 32180157-S</b> | <b>6</b> | 2013   | France   | Paris         | Osteoarticular infection |
| <b>CAN 7</b>          | <b>6</b> | 2006   | Canada   | Montreal      | Osteoarticular infection |
| <b>CAN 12</b>         | <b>6</b> | 2008   | Canada   | Montreal      | Unknown                  |
| <b>CAN 13</b>         | <b>6</b> | 2009   | Canada   | Montreal      | Osteoarticular infection |
| <b>CAN 22</b>         | <b>6</b> | 2012   | Canada   | Montreal      | Occult Bacteremia        |
| <b>CAN 23</b>         | <b>6</b> | 2012   | Canada   | Montreal      | Osteoarticular infection |
| <b>CA48</b>           | <b>6</b> | 2001   | Spain    | Barcelona     | Osteoarticular infection |
| <b>CA49</b>           | <b>6</b> | 2001   | Spain    | Barcelona     | Osteoarticular infection |
| <b>CA64</b>           | <b>6</b> | 2004   | Spain    | Barcelona     | Occult Bacteremia        |
| <b>CA65</b>           | <b>6</b> | 2004   | Spain    | Barcelona     | Occult Bacteremia        |
| <b>CA73</b>           | <b>6</b> | 2006   | Spain    | Barcelona     | Osteoarticular infection |
| <b>CA75</b>           | <b>6</b> | 2006   | Spain    | Barcelona     | Occult Bacteremia        |
| <b>CA122</b>          | <b>6</b> | 2010   | Spain    | Barcelona     | Osteoarticular infection |
| <b>BON 36648-LA</b>   | <b>6</b> | 2013   | France   | Paris         | Osteoarticular infection |
| KK240                 | 7        | 2005   | Israel   | South         | Osteoarticular infection |
| <b>KK172</b>          | <b>7</b> | 2001   | Israel   | North         | Occult Bacteremia        |
| <b>KK244</b>          | <b>7</b> | 2005   | Israel   | North         | Occult Bacteremia        |
| <b>KK263</b>          | <b>7</b> | 2008   | Israel   | Center        | Occult Bacteremia        |
| <b>PER858c</b>        | <b>7</b> | 2010   | Israel   | South         | Carriage                 |
| <b>PER927</b>         | <b>7</b> | 2010   | Israel   | South         | Carriage                 |
| D2363                 | 8        | 2007   | Israel   | South         | Carriage                 |
| <b>Pantia 24.9</b>    | <b>8</b> | 2012   | Israel   | South         | Carriage                 |
| <b>PER3</b>           | <b>8</b> | 2009   | Israel   | South         | Carriage                 |
| <b>PER2854</b>        | <b>8</b> | 2011   | Israel   | South         | Carriage                 |
| <b>S1010080184</b>    | <b>8</b> | 2010   | Iceland  | Reykjavik     | Osteoarticular infection |
| KK194                 | 9        | 2003   | Russia   | St Petersburg | Carriage                 |

|                        |           |      |        |           |                                |
|------------------------|-----------|------|--------|-----------|--------------------------------|
| KK180                  | 10        | 2002 | Israel | Center    | Endocarditis                   |
| KK56                   | 11        | 1994 | Israel | South     | Osteoarticular infection       |
| PV1748                 | 11        | 2007 | Israel | South     | Carriage                       |
| <b>Sch429</b>          | <b>11</b> | 2011 | Israel | South     | Carriage                       |
| <b>KK63</b>            | <b>11</b> | 1994 | Israel | South     | Carriage                       |
| <b>KK120</b>           | <b>11</b> | 1996 | Israel | South     | Carriage                       |
| <b>KK200</b>           | <b>11</b> | 2004 | Israel | South     | Carriage                       |
| AA105                  | 12        | 2006 | Israel | South     | Carriage                       |
| AA255                  | 12        | 2006 | Israel | North     | Carriage                       |
| <b>KK417</b>           | <b>12</b> | 2011 | Israel | South     | Osteoarticular infection       |
| <b>C2005003818</b>     | <b>12</b> | 2005 | USA    | Minnesota | Osteoarticular infection       |
| <b>CAN 2</b>           | <b>12</b> | 2005 | Canada | Montreal  | Osteoarticular infection       |
| KK183                  | 13        | 2002 | Israel | North     | Osteoarticular infection       |
| CIP 73.01              | 14        | 1972 | France | Besançon  | Occult Bacteremia              |
| CIP 101722             | 14        | 1985 | France | Grenoble  | Occult Bacteremia              |
| BOU 30672              | 14        | 2010 | France | Paris     | Osteoarticular infection       |
| MAT 26683              | 14        | 2008 | France | Paris     | Osteoarticular infection       |
| N10-6602               | 14        | 2010 | France | Nantes    | Osteoarticular infection       |
| OUA 30390              | 14        | 2010 | France | Paris     | Osteoarticular infection       |
| S1100633               | 14        | 2011 | France | Paris     | Osteoarticular infection       |
| AA207                  | 14        | 2006 | Israel | South     | Carriage                       |
| KK12                   | 14        | 1994 | Israel | South     | Carriage                       |
| KK83                   | 14        | 1991 | Israel | South     | Osteoarticular infection       |
| KK412                  | 14        | 2004 | USA    | St Louis  | Osteoarticular infection       |
| <b>AA203</b>           | <b>14</b> | 2006 | Israel | South     | Carriage                       |
| <b>KK136</b>           | <b>14</b> | 1998 | Israel | North     | Occult Bacteremia              |
| <b>OHO 30250170-S</b>  | <b>14</b> | 2013 | France | Paris     | Skin and soft tissue infection |
| <b>C2012000896</b>     | <b>14</b> | 2012 | USA    | Minnesota | Osteoarticular infection       |
| <b>C2009033016</b>     | <b>14</b> | 2009 | USA    | Minnesota | Osteoarticular infection       |
| <b>GRO 7183</b>        | <b>14</b> | 2010 | France | Bordeaux  | Osteoarticular infection       |
| <b>CAN 3</b>           | <b>14</b> | 2005 | Canada | Montreal  | Osteoarticular infection       |
| <b>CAN 4</b>           | <b>14</b> | 2006 | Canada | Montreal  | Osteoarticular infection       |
| <b>CAN 6</b>           | <b>14</b> | 2006 | Canada | Montreal  | Osteoarticular infection       |
| <b>CAN 10</b>          | <b>14</b> | 2007 | Canada | Montreal  | Unknown                        |
| <b>CAN 15</b>          | <b>14</b> | 2010 | Canada | Montreal  | Unknown                        |
| <b>CAN 19</b>          | <b>14</b> | 2011 | Canada | Montreal  | Unknown                        |
| <b>CAN 20</b>          | <b>14</b> | 2011 | Canada | Montreal  | Osteoarticular infection       |
| <b>CAN 24</b>          | <b>14</b> | 2013 | Canada | Montreal  | Osteoarticular infection       |
| <b>BRU 32800001-LA</b> | <b>14</b> | 2013 | France | Paris     | Osteoarticular infection       |
| <b>CA7</b>             | <b>14</b> | 1997 | Spain  | Barcelona | Osteoarticular infection       |
| <b>CA40</b>            | <b>14</b> | 2000 | Spain  | Barcelona | Osteoarticular infection       |
| <b>CA61</b>            | <b>14</b> | 2003 | Spain  | Barcelona | Osteoarticular infection       |
| <b>CA63</b>            | <b>14</b> | 2004 | Spain  | Barcelona | Occult Bacteremia              |
| <b>CA66</b>            | <b>14</b> | 2004 | Spain  | Barcelona | Osteoarticular infection       |
| <b>CA67</b>            | <b>14</b> | 2004 | Spain  | Barcelona | Occult Bacteremia              |
| <b>CA68</b>            | <b>14</b> | 2004 | Spain  | Barcelona | Osteoarticular infection       |
| <b>CA78</b>            | <b>14</b> | 2006 | Spain  | Barcelona | Osteoarticular infection       |
| <b>CA83</b>            | <b>14</b> | 2007 | Spain  | Barcelona | Osteoarticular infection       |
| <b>CA84</b>            | <b>14</b> | 2007 | Spain  | Barcelona | Osteoarticular infection       |
| <b>CA85</b>            | <b>14</b> | 2007 | Spain  | Barcelona | Osteoarticular infection       |
| <b>CA88</b>            | <b>14</b> | 2008 | Spain  | Barcelona | Osteoarticular infection       |
| <b>CA94</b>            | <b>14</b> | 2008 | Spain  | Barcelona | Osteoarticular infection       |
| <b>CA95</b>            | <b>14</b> | 2008 | Spain  | Barcelona | Osteoarticular infection       |
| <b>CA112</b>           | <b>14</b> | 2009 | Spain  | Barcelona | Osteoarticular infection       |

|                         |           |       |         |           |                          |
|-------------------------|-----------|-------|---------|-----------|--------------------------|
| <b>CA120</b>            | <b>14</b> | 2010  | Spain   | Barcelona | Occult Bacteremia        |
| <b>CA138</b>            | <b>14</b> | 2012  | Spain   | Barcelona | Osteoarticular infection |
| <b>BOUT 33630109-LA</b> | <b>14</b> | 2013  | France  | Paris     | Osteoarticular infection |
| <b>LAC 40040059-S</b>   | <b>14</b> | 2014  | France  | Paris     | Osteoarticular infection |
| KK64                    | 15        | 1990s | Israel  | North     | Osteoarticular infection |
| KK127                   | 16        | 1990s | Israel  | North     | Osteoarticular infection |
| ATCC 23332              | 17        | 1970s | Norway  | Oslo      | Occult Bacteremia        |
| POH 14284               | 18        | 2011  | France  | Paris     | Osteoarticular infection |
| TEI 137111              | 18        | 2011  | France  | Paris     | Osteoarticular infection |
| WAN 11661               | 18        | 2011  | France  | Paris     | Osteoarticular infection |
| <b>KK154</b>            | <b>18</b> | 1999  | Israel  | South     | Occult Bacteremia        |
| <b>KK407</b>            | <b>18</b> | 2011  | Israel  | South     | Occult Bacteremia        |
| <b>Sch258</b>           | <b>18</b> | 2010  | Israel  | South     | Carriage                 |
| <b>Sch1288</b>          | <b>18</b> | 2012  | Israel  | South     | Carriage                 |
| <b>PER641</b>           | <b>18</b> | 2010  | Israel  | South     | Carriage                 |
| CIP 102473              | 19        | 1986  | France  | Paris     | Osteoarticular infection |
| CIP 102470              | 19        | 1986  | France  | Paris     | Osteoarticular infection |
| SCH 25972               | 20        | 2007  | France  | Paris     | Osteoarticular infection |
| AA024                   | 21        | 2007  | Israel  | South     | Carriage                 |
| KK224                   | 21        | 2005  | Israel  | Center    | Carriage                 |
| KK225                   | 21        | 2005  | Israel  | Center    | Carriage                 |
| KK256                   | 21        | 2007  | Israel  | South     | Osteoarticular infection |
| KK409                   | 21        | 2010  | Israel  | East      | Endocarditis             |
| HER 31223               | 22        | 2010  | France  | Paris     | Osteoarticular infection |
| BB012                   | 22        | 2006  | Israel  | South     | Carriage                 |
| BB728                   | 22        | 2006  | Israel  | South     | Carriage                 |
| KK81                    | 22        | 1991  | Israel  | South     | Osteoarticular infection |
| <b>C1563</b>            | <b>22</b> | 2006  | Israel  | South     | Carriage                 |
| <b>C1724</b>            | <b>22</b> | 2007  | Israel  | South     | Carriage                 |
| <b>KK142</b>            | <b>22</b> | 1998  | Israel  | South     | Osteoarticular infection |
| <b>KK217</b>            | <b>22</b> | 2004  | Israel  | South     | Occult Bacteremia        |
| <b>KK98</b>             | <b>22</b> | 1992  | Israel  | South     | Occult Bacteremia        |
| <b>C2006001196</b>      | <b>22</b> | 2006  | USA     | Minnesota | Osteoarticular infection |
| <b>C2006001744</b>      | <b>22</b> | 2006  | USA     | Minnesota | Osteoarticular infection |
| <b>0410+23083</b>       | <b>22</b> | 2004  | Iceland | Reykjavik | Osteoarticular infection |
| <b>9911+17199</b>       | <b>22</b> | 1999  | Iceland | Reykjavik | Osteoarticular infection |
| ATCC 23331              | 23        | 1968  | Norway  | Oslo      | Occult Bacteremia        |
| N10-6318                | 23        | 2010  | France  | Nantes    | Osteoarticular infection |
| BB016                   | 23        | 2006  | Israel  | South     | Carriage                 |
| BB463                   | 23        | 2007  | Israel  | South     | Carriage                 |
| KK97                    | 23        | 1992  | Israel  | South     | Occult Bacteremia        |
| <b>KK164</b>            | <b>23</b> | 2000  | Israel  | South     | Occult Bacteremia        |
| <b>KK153</b>            | <b>23</b> | 1999  | Israel  | North     | Endocarditis             |
| <b>KK184</b>            | <b>23</b> | 2002  | Israel  | North     | Osteoarticular infection |
| <b>KK104</b>            | <b>23</b> | 1996  | Israel  | South     | Carriage                 |
| <b>KK114</b>            | <b>23</b> | 1996  | Israel  | South     | Carriage                 |
| <b>M2003000170</b>      | <b>23</b> | 2003  | USA     | Minnesota | Carriage                 |
| <b>C2003003154</b>      | <b>23</b> | 2003  | USA     | Minnesota | Osteoarticular infection |
| <b>0401+20177</b>       | <b>23</b> | 2004  | Iceland | Reykjavik | Osteoarticular infection |
| <b>0601+26281</b>       | <b>23</b> | 2006  | Iceland | Reykjavik | Osteoarticular infection |
| <b>CAN 17</b>           | <b>23</b> | 2011  | Canada  | Montreal  | Osteoarticular infection |
| <b>CA20</b>             | <b>23</b> | 1998  | Spain   | Barcelona | Osteoarticular infection |
| D7517                   | 24        | 2007  | Israel  | South     | Carriage                 |
| KK93                    | 24        | 1995  | Israel  | South     | Occult Bacteremia        |

|                        |           |       |        |           |                          |
|------------------------|-----------|-------|--------|-----------|--------------------------|
| KK128                  | 24        | 1990s | Israel | South     | Endocarditis             |
| KK190                  | 24        | 2002  | Israel | South     | Endocarditis             |
| KK197                  | 24        | 2003  | Israel | Center    | Endocarditis             |
| <b>KK100</b>           | <b>24</b> | 1996  | Israel | South     | Osteoarticular infection |
| <b>KK144</b>           | <b>24</b> | 1998  | Israel | South     | Osteoarticular infection |
| <b>KK271</b>           | <b>24</b> | 2009  | Israel | South     | Occult Bacteremia        |
| <b>KK165</b>           | <b>24</b> | 2000  | Israel | South     | Osteoarticular infection |
| <b>KK408</b>           | <b>24</b> | 2010  | Israel | South     | Occult Bacteremia        |
| <b>Sch2108</b>         | <b>24</b> | 2012  | Israel | South     | Carriage                 |
| <b>KK212</b>           | <b>24</b> | 2004  | Israel | South     | Carriage                 |
| <b>PER7</b>            | <b>24</b> | 2009  | Israel | South     | Carriage                 |
| BIA 29991              | 25        | 2009  | France | Paris     | Osteoarticular infection |
| BUS 25298              | 25        | 2007  | France | Paris     | Osteoarticular infection |
| MEN 26437              | 25        | 2007  | France | Paris     | Osteoarticular infection |
| WAR 26245              | 25        | 2007  | France | Paris     | Osteoarticular infection |
| R4599                  | 25        | 2011  | France | Paris     | Osteoarticular infection |
| S1003337               | 25        | 2010  | France | Paris     | Osteoarticular infection |
| <b>MOU 30470108-S</b>  | <b>25</b> | 2013  | France | Paris     | Osteoarticular infection |
| <b>POT 30310159-S</b>  | <b>25</b> | 2013  | France | Paris     | Skin and soft tissue     |
| <b>STF4A</b>           | <b>25</b> | 2011  | France | Paris     | infection                |
| <b>PER251</b>          | <b>25</b> | 2010  | Israel |           | Carriage                 |
| <b>ZEH 30720147-S</b>  | <b>25</b> | 2013  | France | Paris     | Carriage                 |
| <b>GOU 30530173-S</b>  | <b>25</b> | 2013  | France | Paris     | Osteoarticular infection |
| <b>GUE 30190154</b>    | <b>25</b> | 2013  | France | Paris     | Osteoarticular infection |
| <b>STM 30240164-S</b>  | <b>25</b> | 2013  | France | Paris     | Carriage                 |
| <b>BEN 31330178-S</b>  | <b>25</b> | 2013  | France | Paris     | Carriage                 |
| <b>DOR 8225</b>        | <b>25</b> | 2012  | France | Bordeaux  | Osteoarticular infection |
| <b>AIM 31840012-P</b>  | <b>25</b> | 2013  | France | Paris     | Unknown                  |
| <b>SIM 32430101-LA</b> | <b>25</b> | 2013  | France | Paris     | Skin and soft tissue     |
| <b>CAN 1</b>           | <b>25</b> | 2003  | Canada | Montreal  | infection                |
| <b>CAN 5</b>           | <b>25</b> | 2006  | Canada | Montreal  | Osteoarticular infection |
| <b>CAN 11</b>          | <b>25</b> | 2008  | Canada | Montreal  | Osteoarticular infection |
| <b>CAR 32860064-S</b>  | <b>25</b> | 2013  | France | Paris     | Unknown                  |
| <b>CA57</b>            | <b>25</b> | 2002  | Spain  | Barcelona | Osteoarticular infection |
| <b>CA77</b>            | <b>25</b> | 2006  | Spain  | Barcelona | Osteoarticular infection |
| <b>CA129</b>           | <b>25</b> | 2011  | Spain  | Barcelona | Osteoarticular infection |
| <b>CRA 32950107-S</b>  | <b>25</b> | 2013  | France | Paris     | Osteoarticular infection |
| <b>COU 1310053120</b>  | <b>25</b> | 2013  | France | Sables    | Unknown                  |
| <b>DES 33550084</b>    | <b>25</b> | 2013  | France | d'Olonnes | Endocarditis             |
| SAI 11985              | 26        | 2011  | France | Paris     | Osteoarticular infection |
| BB307                  | 27        | 2006  | Israel | South     | Osteoarticular infection |
| CC254                  | 27        | 2006  | Israel | South     | Carriage                 |
| KK242                  | 27        | 2005  | Israel | South     | Carriage                 |
| <b>KK208</b>           | <b>27</b> | 2004  | Israel | South     | Occult Bacteremia        |
| <b>Sch535</b>          | <b>27</b> | 2011  | Israel | South     | Occult Bacteremia        |
| <b>Sch1614</b>         | <b>27</b> | 2012  | Israel | South     | Carriage                 |
| <b>PER2797c</b>        | <b>27</b> | 2011  | Israel | South     | Carriage                 |
| N10-10770              | 28        | 2010  | France | Nantes    | Carriage                 |
| <b>PER2748</b>         | <b>28</b> | 2011  | Israel | South     | Occult Bacteremia        |
| KK174                  | 29        | 1998  | Israel | South     | Carriage                 |
| PV1746                 | 30        | 2006  | Israel | South     | Occult Bacteremia        |
| KK113                  | 31        | 1996  | Israel | South     | Carriage                 |

|                       |           |      |         |           |                          |
|-----------------------|-----------|------|---------|-----------|--------------------------|
| <b>KK125</b>          | <b>31</b> | 1997 | Israel  | South     | Carriage                 |
| <b>PER1851</b>        | <b>31</b> | 2010 | Israel  | South     | Carriage                 |
| <b>MAR 1853</b>       | <b>32</b> | 2011 | France  | Paris     | Osteoarticular infection |
| <b>KK245</b>          | <b>33</b> | 2005 | Israel  | South     | Occult Bacteremia        |
| <b>BB114</b>          | <b>34</b> | 2006 | Israel  | South     | Carriage                 |
| <b>EE160</b>          | <b>34</b> | 2006 | Israel  | South     | Carriage                 |
| <b>AA430</b>          | <b>34</b> | 2007 | Israel  | South     | Carriage                 |
| <b>AA478</b>          | <b>34</b> | 2007 | Israel  | South     | Carriage                 |
| <b>13.2/307</b>       | <b>34</b> | 2001 | Israel  | South     | Carriage                 |
| <b>2.12/151</b>       | <b>34</b> | 2001 | Israel  | South     | Carriage                 |
| <b>718005</b>         | <b>34</b> | 2001 | Israel  | South     | Carriage                 |
| <b>AA348</b>          | <b>34</b> | 2008 | Israel  | South     | Carriage                 |
| <b>AA068</b>          | <b>35</b> | 2007 | Israel  | South     | Carriage                 |
| <b>KK75</b>           | <b>35</b> | 1991 | Israel  | South     | Osteoarticular infection |
| <b>KK141</b>          | <b>35</b> | 1998 | Israel  | South     | Osteoarticular infection |
| <b>KK189</b>          | <b>35</b> | 2002 | Israel  | South     | Occult Bacteremia        |
| <b>BB11960</b>        | <b>35</b> | 2004 | Israel  | Center    | Osteoarticular infection |
| <b>KK59</b>           | <b>35</b> | 1993 | Israel  | South     | Occult Bacteremia        |
| <b>Sch1136</b>        | <b>35</b> | 2011 | Israel  | South     | Carriage                 |
| <b>Sch1931</b>        | <b>35</b> | 2012 | Israel  | South     | Carriage                 |
| <b>PER1756</b>        | <b>35</b> | 2010 | Israel  | South     | Carriage                 |
| <b>0111+28183</b>     | <b>35</b> | 2001 | Iceland | Reykjavik | Osteoarticular infection |
| <b>0604+12258</b>     | <b>35</b> | 2006 | Iceland | Reykjavik | Osteoarticular infection |
| <b>OUT 30940011-S</b> | <b>35</b> | 2013 | France  | Paris     | Unknown                  |
| <b>CAT 30640171-S</b> | <b>35</b> | 2013 | France  | Paris     | Osteoarticular infection |
| <b>SAI 30140210-S</b> | <b>35</b> | 2013 | France  | Paris     | Osteoarticular infection |
| <b>SAN 6539</b>       | <b>35</b> | 2009 | France  | Bordeaux  | Osteoarticular infection |
| <b>CAN 18</b>         | <b>35</b> | 2011 | Canada  | Montreal  | Occult Bacteremia        |
| <b>KK158</b>          | <b>36</b> | 1999 | Israel  | South     | Osteoarticular infection |
| <b>AA026</b>          | <b>37</b> | 2006 | Israel  | South     | Carriage                 |
| <b>KK247</b>          | <b>38</b> | 2006 | Israel  | East      | Endocarditis             |
| <b>AA687</b>          | <b>39</b> | 2007 | Israel  | South     | Carriage                 |
| <b>PVC1618</b>        | <b>39</b> | 2006 | Israel  | South     | Carriage                 |
| <b>AA545</b>          | <b>39</b> | 2008 | Israel  | South     | Carriage                 |
| <b>BB307</b>          | <b>40</b> | 2007 | Israel  | South     | Carriage                 |
| <b>15/4.267</b>       | <b>40</b> | 2001 | Israel  | South     | Carriage                 |
| <b>KWG1</b>           | <b>41</b> | 2013 | France  | Paris     | Osteoarticular infection |
| <b>DER 112012-1</b>   | <b>42</b> | 2012 | France  | Paris     | Osteoarticular infection |
| <b>ETI 126580</b>     | <b>43</b> | 2011 | France  | Paris     | Osteoarticular infection |
| <b>AGO 30220109-S</b> | <b>44</b> | 2013 | France  | Paris     | Osteoarticular infection |
| <b>SEN 32910121-S</b> | <b>44</b> | 2013 | France  | Paris     | Osteoarticular infection |
| <b>S0910230213</b>    | <b>45</b> | 2009 | Iceland | Reykjavik | Osteoarticular infection |
| <b>FOF 3022006-S</b>  | <b>46</b> | 2013 | France  | Paris     | Osteoarticular infection |
| <b>C2006003006</b>    | <b>47</b> | 2006 | USA     | Minnesota | Osteoarticular infection |
| <b>KK168</b>          | <b>48</b> | 2001 | Israel  | South     | Osteoarticular infection |
| <b>Sch87</b>          | <b>49</b> | 2010 | Israel  | South     | Carriage                 |
| <b>ZUL 30220039-S</b> | <b>50</b> | 2013 | France  | Paris     | Carriage                 |
| <b>KK220</b>          | <b>51</b> | 1994 | Israel  | South     | Osteoarticular infection |
| <b>KK433</b>          | <b>52</b> | 2012 | Israel  | Center    | Osteoarticular infection |
| <b>KK267</b>          | <b>53</b> | 2008 | Israel  | South     | Osteoarticular infection |
| <b>C2009000170</b>    | <b>53</b> | 2009 | USA     | Minnesota | Osteoarticular infection |
| <b>KK420</b>          | <b>54</b> | 2011 | Israel  | Center    | Osteoarticular infection |
| <b>DAG 31560001-S</b> | <b>55</b> | 2013 | France  | Paris     | Osteoarticular infection |
| <b>AUD 31930140-S</b> | <b>56</b> | 2013 | France  | Paris     | Osteoarticular infection |

---

|                    |           |      |        |           |                          |
|--------------------|-----------|------|--------|-----------|--------------------------|
| <b>CAN 8</b>       | <b>57</b> | 2007 | Canada | Montreal  | Osteoarticular infection |
| <b>CAN 16</b>      | <b>58</b> | 2010 | Canada | Montreal  | Osteoarticular infection |
| <b>CAN 21</b>      | <b>59</b> | 2012 | Canada | Montreal  | Osteoarticular infection |
| <b>CAN 25</b>      | <b>60</b> | 2013 | Canada | Montreal  | Osteoarticular infection |
| <b>CA99</b>        | <b>61</b> | 2009 | Spain  | Barcelona | Osteoarticular infection |
| <b>CAN 9</b>       | <b>62</b> | 2007 | Canada | Montreal  | Osteoarticular infection |
| <b>CA105</b>       | <b>62</b> | 2009 | Spain  | Barcelona | Occult Bacteremia        |
| <b>CA139</b>       | <b>63</b> | 2012 | Spain  | Barcelona | Carriage                 |
| <b>C2005004024</b> | <b>64</b> | 2005 | USA    | Minnesota | Osteoarticular infection |

---
