# Supplementary material
Source: PubMed Central journal article supplement (PMC4313220)
Supplement: JCM.01609-14_zjm999093794so2.pdf [file JCM.01609-14_zjm999093794so2.pdf]

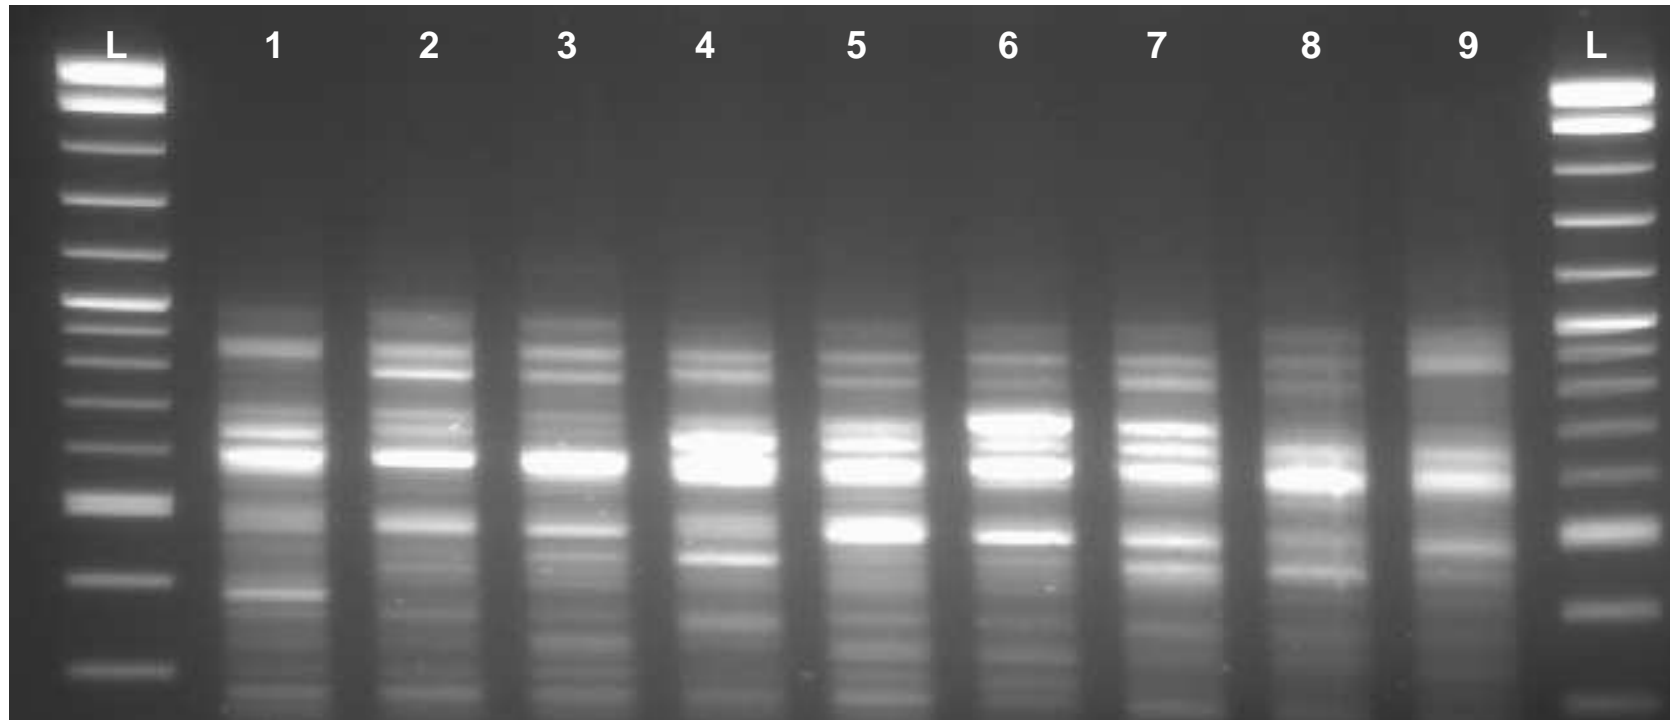

**Supplemental Figure 1. Gel electrophoresis of the PCR targeting the *Kingella kingae* DNA uptake sequence on one strain of nine minor sequence types (ST).**

L: molecular marker; 1: BB631 (ST-5); 2: D2363 (ST-8); 3: CIP102473 (ST-19); 4: KK242 (ST-27); 5: N10770 (ST-28); 6: KK113 (ST-31); 7: ETI 1665680 (ST-43); 8: KK168 (ST-48); 9: KK267 (ST-53)
